# Supplementary material
Source: PubMed Central journal article supplement (PMC3715995)
Supplement: NIHMS484670-supplement-supplement_1.pdf [file NIHMS484670-supplement-supplement_1.pdf]

## SUPPLEMENTARY ONLINE DATA

# Neutral sphingomyelinase 2 (nSMase2) is the primary neutral sphingomyelinase isoform activated by tumour necrosis factor- $\alpha$ in MCF-7 cells

Christopher J. CLARKE, Emily A. CLOESSNER, Patrick L. RODDY and Yusuf A. HANNUN<sup>1</sup>

Department of Biochemistry and Molecular Biology, Medical University of South Carolina, Charleston, SC 29425, U.S.A.

## MATERIALS AND METHODS

## N-SMase assay buffer compositions

The composition of the buffer in the standard assay [1] is 200 mM Tris/HCl (pH 7.4), 5 mM MgCl<sub>2</sub>, 2.5 mM dithiothreitol, 2 mM EDTA, 0.2% Triton X-100, 1 mM PMSF, 50  $\mu$ M phosphatidylserine, 100  $\mu$ M SM and  $1 \times 10^5$  c.p.m. [<sup>14</sup>C]SM.

The composition of the buffer in the alternative assay [2] is 20 mM Hepes (pH 7.4), 10 mM MgCl<sub>2</sub>, 2 mM EDTA, 0.1 mM sodium orthovanadate, 0.1 mM molybdic acid (sodium salt), 30 mM *p*-nitrophenylate, 10 mM 2-glycerophosphate, 750  $\mu$ M ATP, 1 mM PMSF, 10  $\mu$ M leupeptin, 10  $\mu$ M pepstatin, 0.5% CHAPS and  $1 \times 10^6$  c.p.m. [<sup>14</sup>C]SM.

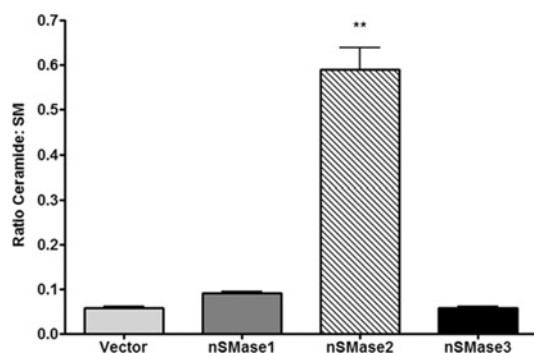

**Figure S1** Transient overexpression of nSMase2, but not nSMase1 or nSMase3, in HEK-293 cells alters the ceramide/SM ratio

HEK-293 cells were transiently transfected with nSMase1, nSMase2 or nSMase3 for 48 h. Cellular ceramide levels were analysed by LC-MS/MS as described in the Materials and methods section of the main text. Results, expressed as the ceramide/SM ratio, are means  $\pm$  S.E.M. (\*\* $P < 0.01$ , one-way ANOVA with Dunnett's post-hoc test,  $n = 4$ ).

## REFERENCES

- 1 Marchesini, N., Luberto, C. and Hannun, Y. A. (2003) Biochemical properties of mammalian neutral sphingomyelinase 2 and its role in sphingolipid metabolism. *J. Biol. Chem.* **278**, 13775–13783
- 2 Krut, O., Wiegmann, K., Kashkar, H., Yazdanpanah, B. and Kronke, M. (2006) Novel TNF-responsive mammalian neutral sphingomyelinase-3 is a C-tail-anchored protein. *J. Biol. Chem.* **281**, 13784–13793

Received 25 October 2010/3 February 2011; accepted 8 February 2011  
Published as BJ Immediate Publication 8 February 2011, doi:10.1042/BJ20101752

<sup>1</sup> To whom correspondence should be addressed (email hannun@musc.edu).
